# Supplementary material for: Coronene diimide-based ‘bowl’ nanostructures as red emitters for the analysis of latent fingerprints and metal ion detection
Source: Royal Society of Chemistry journal article supplement (doi:10.1039/d0ra09607e), 2021-01-01
Supplement: d0ra09607e1.pdf [file d0ra09607e1.pdf]

## SUPPORTING INFORMATION

*for*

### **Coronene diimide-based 'bowl' nanostructures as Red Emitter for analysis of Latent fingerprints and metal ion detection**

Prabhpreet Singh<sup>\*a</sup> and Poonam Sharma<sup>b</sup>

<sup>a</sup>*Department of Chemistry, UGC Centre for Advanced Studies, Guru Nanak Dev University, Amritsar  
143 005, India. Tel: +91-84271-01534*

Email: prabhpreet.chem@gndu.ac.in

#### **TABLE OF CONTENTS**

|     |                                                                                                                                              |       |
|-----|----------------------------------------------------------------------------------------------------------------------------------------------|-------|
| 1.  | Experimental section, procedures for sample preparation                                                                                      | 1-3   |
| 2.  | Scheme and characterization data of <b>CDI 2 (Scheme 1 and Figure S1a-e)</b>                                                                 | 3-7   |
| 3.  | TD-DFT calculation of <b>CDI 2 (Figure S2)</b>                                                                                               | 7     |
| 4.  | Absorption spectrum (10 $\mu$ M) of <b>CDI 2</b> in chloroform ( <b>Figure S3</b> )                                                          | 8     |
| 5.  | Emission spectrum and CIE-1931 plots of solid <b>PDI I (Figure S4)</b> .                                                                     | 8     |
| 6.  | Absorption and emission data of <b>CDI 2</b> (10 $\mu$ M) in different ratios of H <sub>2</sub> O and DMSO( <b>Figure S5 and Table S1</b> ). | 9     |
| 7.  | AFM Micrographs of <b>CDI 2 (Figure S 6a-f)</b> .                                                                                            | 10-12 |
| 8.  | Metal Study and titration plots of CDI 2 towards metal sensing ( <b>Figure S7-10</b> ).                                                      | 12-14 |
| 9.  | Absorption and emission spectra of <b>CDI 2</b> (10 $\mu$ M) in different solvents. ( <b>Figure S11</b> )                                    | 14    |
| 10. | Comparison of some previously reported fluorescent materials for LFP development ( <b>Table S2</b> )                                         | 14-16 |

#### **1. Experimental section**

##### ***Materials and reagents***

All the chemicals were purchased from sigma aldrich under HPLC grade. Milli-Q water was used during analysis. Non-porous materials to deposit fingerprints, such as aluminum foil, glass slides, metal surfaces etc. were purchased from nearby market.

##### ***Instrumentation***

1-D ( $^1\text{H}$  and  $^{13}\text{C}$ ) and 2-D (COSEY) spectra were recorded at 500/125 MHz using Bruker Ascend 500 spectrometer using  $\text{CDCl}_3$  as solvents. Fourier transform infrared (FT-IR) spectrum of synthesized material was recorded on Cary 630 FTIR spectrometer (Agilent Technologies). Absorption and Emission spectra were recorded on Shimadzu-1900 spectrophotometer and Shimadzu-RF 6000 spectrofluorometers (Shimadzu, Japan), respectively, using quartz cuvettes with a slit width of 5 nm at room temperature. Atomic force microscope (AFM) to image 3-D textures of surface were recorded on Tosca 400 instrument developed by Anton Paar. DLS data was recorded at  $25.0 \pm 0.1^\circ\text{C}$  using a light scattering apparatus, Zetasizer, Nano-ZS, Nano Series, Malvern Instruments (Malvern, U.K.). Photographs of the developed fingerprints were taken under a UV lamp (365 nm).

### ***Electrochemical Studies***

Metrohm Autolab PGSTAT302N electrochemical workstation was employed for recording cyclic voltammetry (CV) at room temperature. Three-electrode cell system containing a Pt working electrode, Pt wire as counter electrode and  $\text{Ag}/\text{Ag}^+$  (0.1 M  $\text{AgNO}_3$  in  $\text{CH}_3\text{CN}$ ) as reference electrode have been used. Cyclic voltammogram (CV) was recorded at a scan rate of  $50 \text{ mVs}^{-1}$  in the potential range of  $-1.6$  to  $2.0 \text{ V}$  vs  $\text{Ag}/\text{Ag}^+$ . The DCM was used as organic solvent and 0.1 M tetrabutylammonium perchlorate (TBAP) as supporting electrolyte for the voltammetry measurement. The NOVA software was used to collect, plot and analyze the raw data of electrochemical measurements of **CDI 2** compound. The HOMO and LUMO energy levels of **CDI 2** were calculated from the cyclic voltammogram of **CDI 2** by using the equation  $E_{\text{LUMO}} = -[E_{\text{red}}(\text{onset}) + 4.4] \text{ eV}$  and  $E_{\text{HOMO}} = -[E_{\text{ox}}(\text{onset}) + 4.4] \text{ eV}$ .

### ***Thermal Gravity Analysis (TGA)***

The thermogravimetric analysis (TGA) of **CDI 2** was carried out on HITACHI thermogravimetric analyzer (Model STA7200) under  $\text{N}_2$  atmosphere. The non-isothermal decomposition was recorded at a fixed heating rate of  $10^\circ\text{C}/\text{min}$  ranging from  $25^\circ\text{C}$  to  $1000^\circ\text{C}$ . A platinum crucible was used to hold sample in pan. Initially 4.45 mg sample was taken to run the experiment.

### ***UV-Visible and Fluorescence Studies***

Stock solutions for various measurements of **CDI 2** were prepared in DMSO and dilutions of these stock solutions were used for the photo physical measurements. The solutions were diluted with DMSO and water before taking the readings in quartz cells. All absorption and fluorescence scans were processed in Excel<sup>TM</sup> to produce all graphs shown.

### ***Sample preparation for DLS and AFM measurements***

The stock solutions of **CDI 2** (1 mM, DMSO) and water were filtered through Millipore membrane filter (Acrodisc syringe filter, 0.2  $\mu\text{m}$  Supor membrane) before measurements to remove suspended impurities. Solutions (10  $\mu\text{M}$  concentration) of **CDI 2** in DMSO and H<sub>2</sub>O-DMSO (1:1 v/v; 9:1 v/v) were prepared. 2 mL of each of these solutions was taken in glass cuvette to record the DLS spectrum. Samples for AFM analysis were prepared by drop cast method ( $\sim 5$   $\mu\text{L}$  of aliquot of prepared sample) on glass slides.

### *Colour purity index*

Colour purity of **CDI 2** was also calculated using the Colour Calculator software from Osram Sylvania Incorporated according to equations defined by the CIE (International Commission on Illumination).

### *Method for Latent fingerprint development*

Volunteers were chosen to collect fingerprints on various substrates. Before the collection of fingerprints on various substrates, the donors were asked to wash their hands thoroughly with handwash and dry them properly in air to remove the oily dust. Then fingerprints were collected by softly rubbing the finertip across forehead and then deposited on the substrates with minimum pressure. Then these LFPs were developed with **CDI 2** using powder-dusting method. These developed fingerprints were visualized under 365 nm illumination and captured using the mobile phone camera. The powder-dusting procedure in our system is advantageous over previous systems because no additive or cyanoacrylate fuming, professional training and heavy instrumentation required to image LFPs on non-porous substrates.

### *Synthetic Strategy of CDI 2*

The **PDI I** (50 mg, 0.079 mmol) was dissolved in 5-7 mL CH<sub>3</sub>CN in a round bottom flask and then irradiated by sunlight for 7-8 h with continuous stirring. Consumption of the starting material during the reaction was monitored through TLC in CHCl<sub>3</sub>. Upon consumption of the starting material (TLC), the solvent was removed by using rotatory evaporator to get reddish-orange colored crude product. Further purification was performed by chromatography on silica gel (SiO<sub>2</sub>) in Chloroform: Hexane 9:1 to yield orange coloured product (48.2 mg, 96.2%).

**<sup>1</sup>H NMR (500 MHz, CDCl<sub>3</sub>, 25 °C):**  $\delta$  10.02 (s, 1H), 9.22 (s, 1H), 9.17 (m, 3H), 9.02 (d,  $J$  = 8.1 Hz, 1H), 8.56 (s, 1H), 8.41 (d,  $J$  = 7.8 Hz, 1H), 5.28 – 5.17 (m, 2H), 5.02 (d,  $J$  = 2.3 Hz, 2H), 2.66 (t,  $J$  = 2.3 Hz, 1H), 2.49 – 2.36 (m, 4H), 2.16 – 2.03 (m, 4H), 1.06 (m, 12H) (Figure S1a-b).

$^{13}\text{C}$  NMR (125 MHz,  $\text{CDCl}_3$ , 25 °C):  $\delta$  150.06, 134.30, 133.44, 132.84, 130.28, 129.49, 128.78, 128.65, 127.35, 126.83, 125.18, 124.80, 124.61, 124.51, 124.05, 79.19, 75.54, 62.46, 59.57, 29.83, 25.24, 11.45 (Figure S1c).

FT- IR spectrum (ATR):  $\nu_{\text{max}}$  [ $\text{cm}^{-1}$ ] = 2929.7, 2877.5, 2340.8, 2117.1, 1915.9, 1699.6, 1654.9, 1595.3, 1423.8, 1312.0, 1252.4, 1155.5, 1043.7, 1006.3, 931.8, 805.1, 745.4 (Figure S1e).

UV/Vis ( $\text{CHCl}_3$ ):  $\lambda_{\text{max}}$  ( $\epsilon$ ) = 473 nm (20300), 508 nm (30600) (Figure S3).

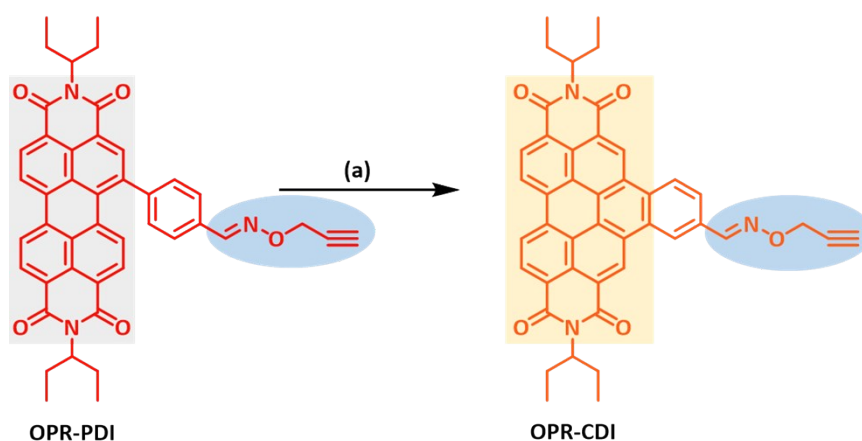

**Scheme S1:** Synthetic scheme to prepare **CDI 2** through photocyclization of **PDI 1** in  $\text{CH}_3\text{CN}$ , 7-8 h.

## 2. Characterization data of CDI 2

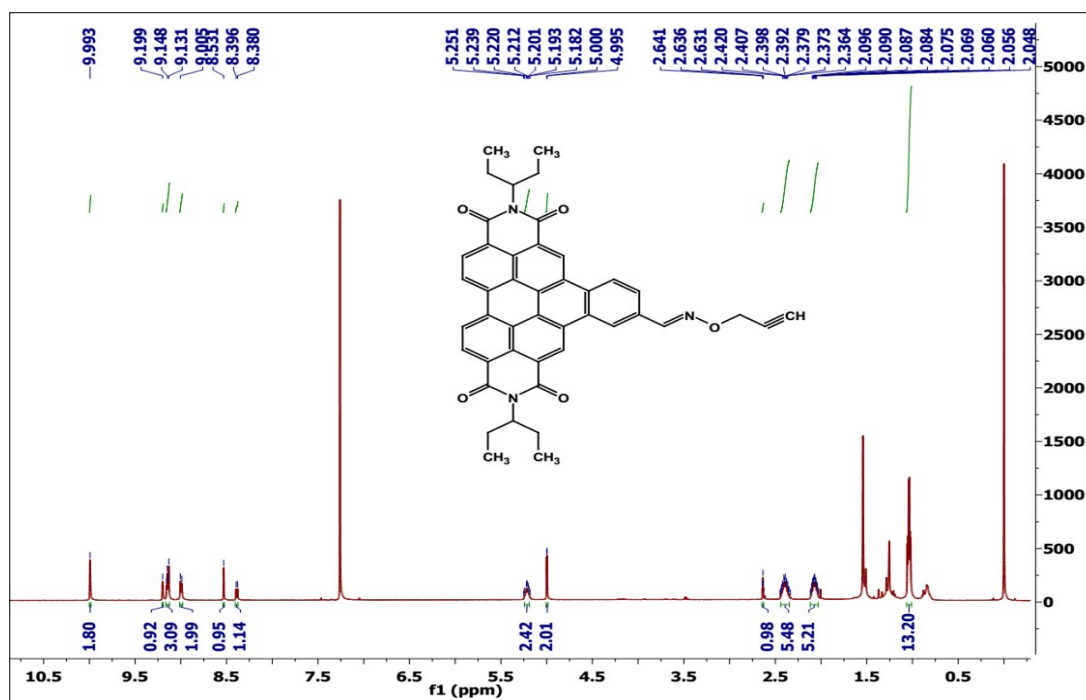

Figure S1a:  $^1\text{H}$  NMR spectrum of CDI 2 in  $\text{CDCl}_3$ .

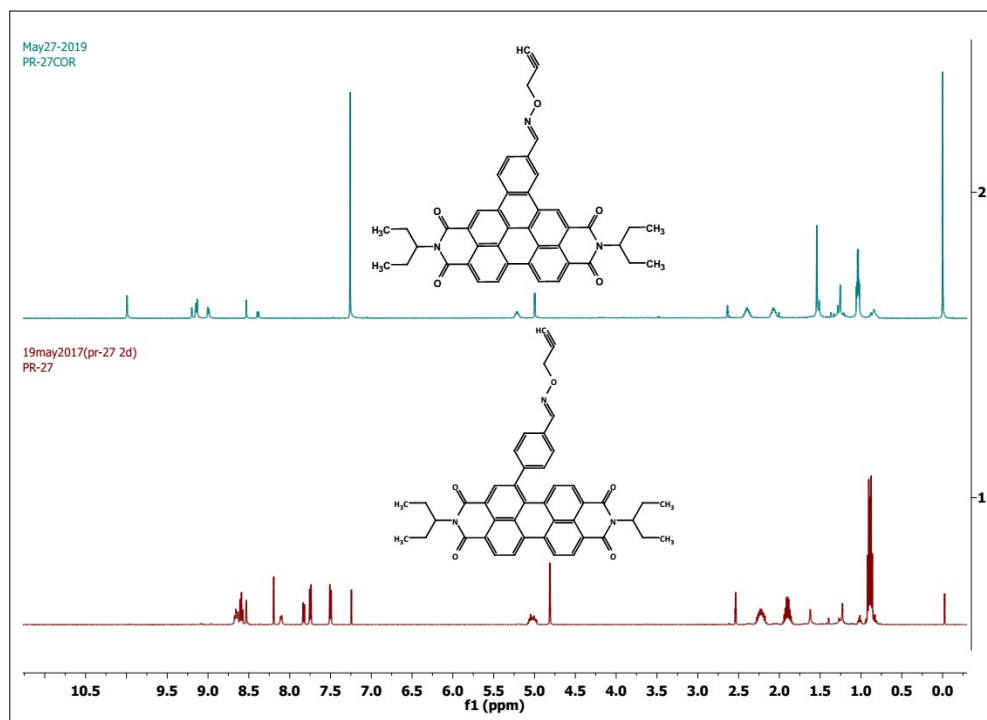

Figure S1b: Comparison of  $^1\text{H}$  NMR spectrum of OPR-PDI and CDI 2 in  $\text{CDCl}_3$ .

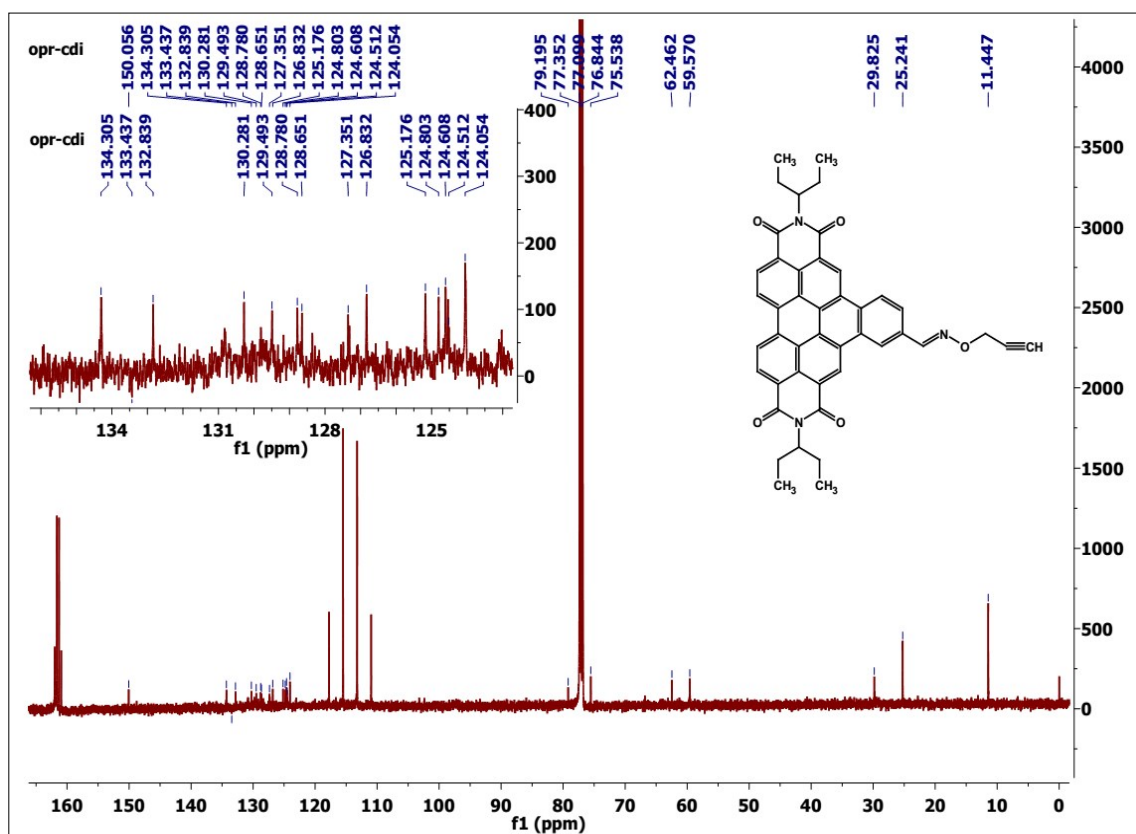

Figure S1c: <sup>13</sup>C NMR spectrum of CDI 2 with one drop of TFA in CDCl<sub>3</sub>.

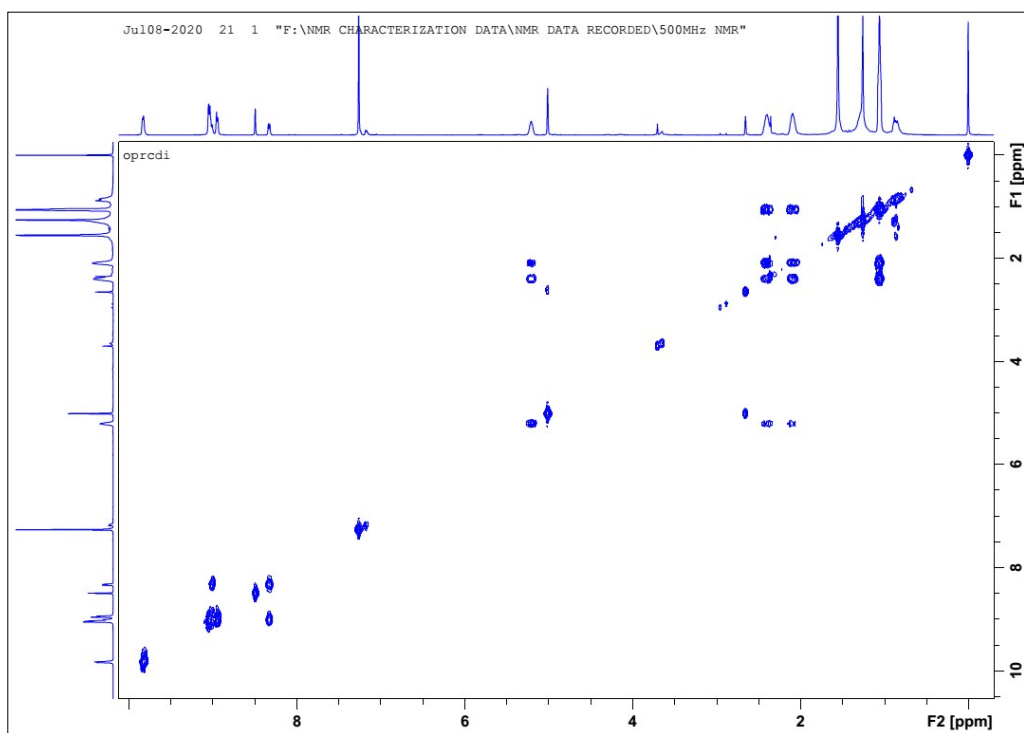

Figure S1d: <sup>1</sup>H-<sup>1</sup>H Correlation (COSEY) spectrum of CDI 2 in CDCl<sub>3</sub>.

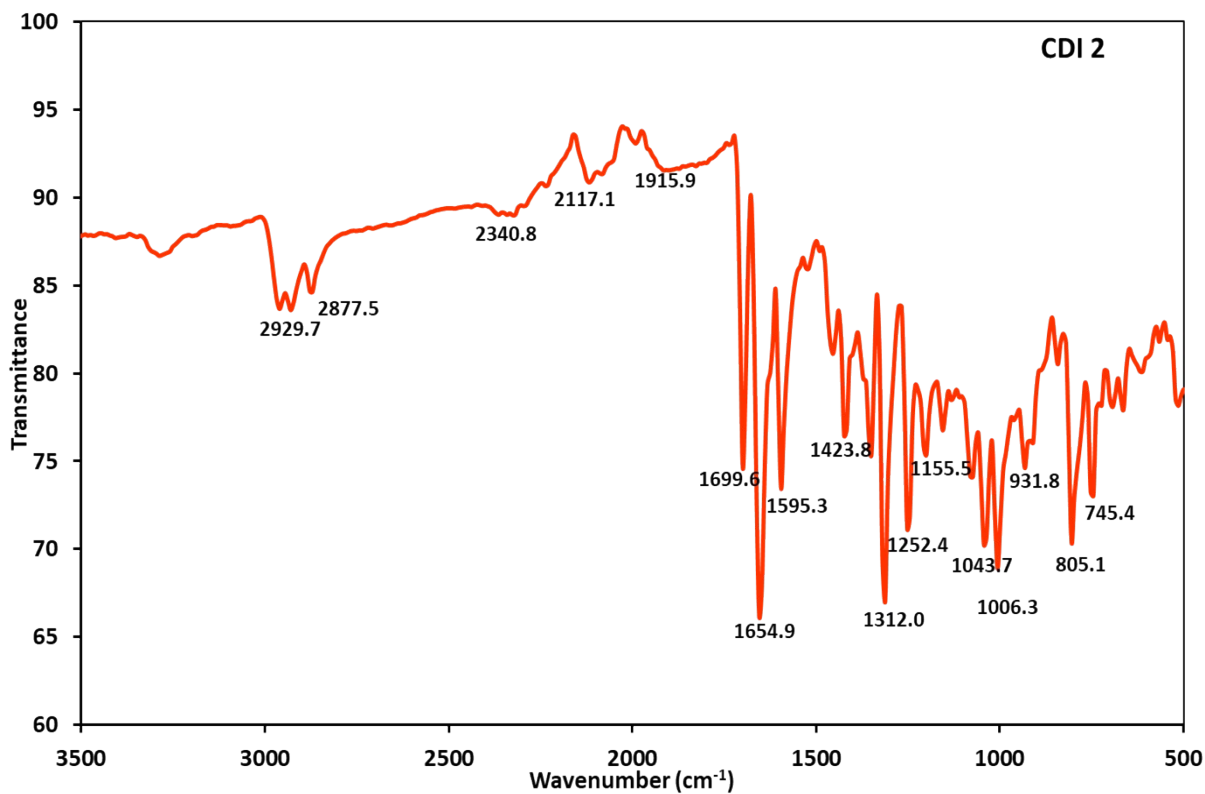

**Figure S1e:** FTIR spectrum of **CDI 2**.

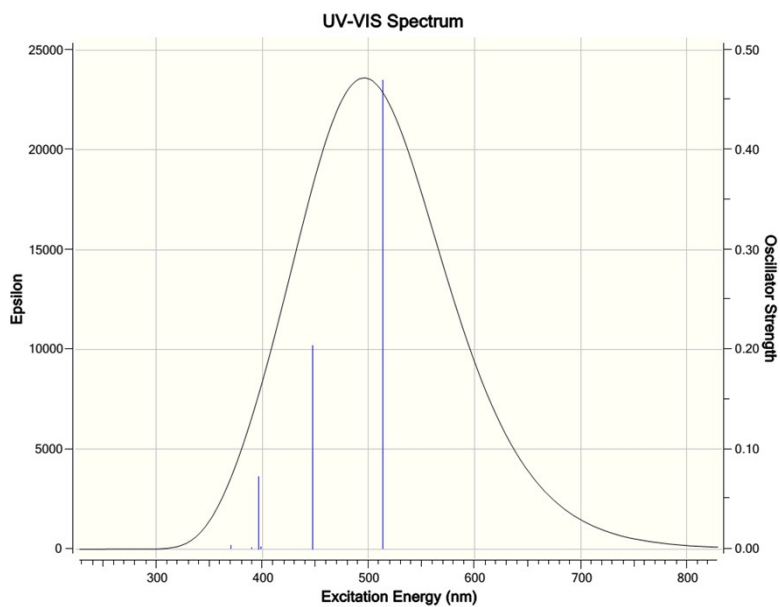

**Figure S2:** UV-Vis spectrum of **CDI 2** calculated in gas phase using time dependent-density functional theory (TD-DFT) calculations at the B3LYP/6-31G basis Set.

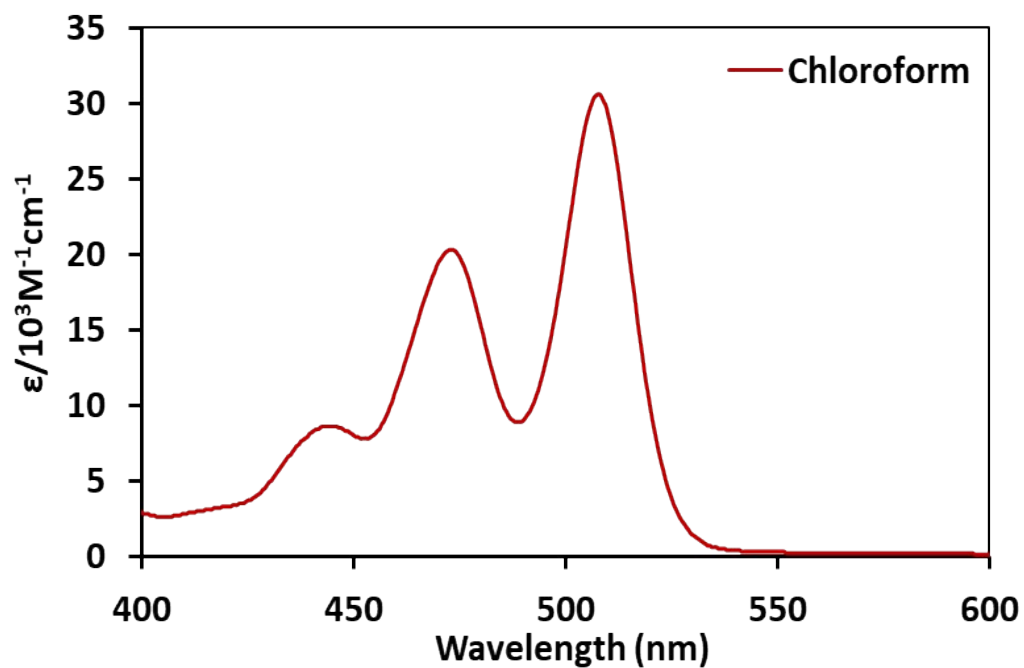

**Figure S3:** Absorption spectrum (10  $\mu$ M) of **CDI 2** in chloroform.

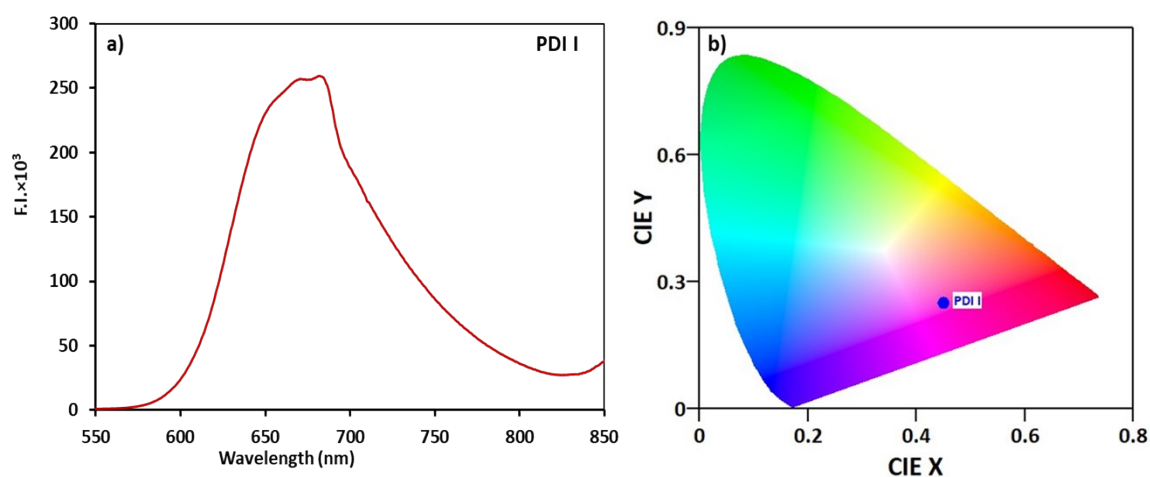

**Figure S4:** (a) Emission spectrum of solid **PDI 1** and (b) CIE-1931 plots corresponding to emission data of **PDI 1**.



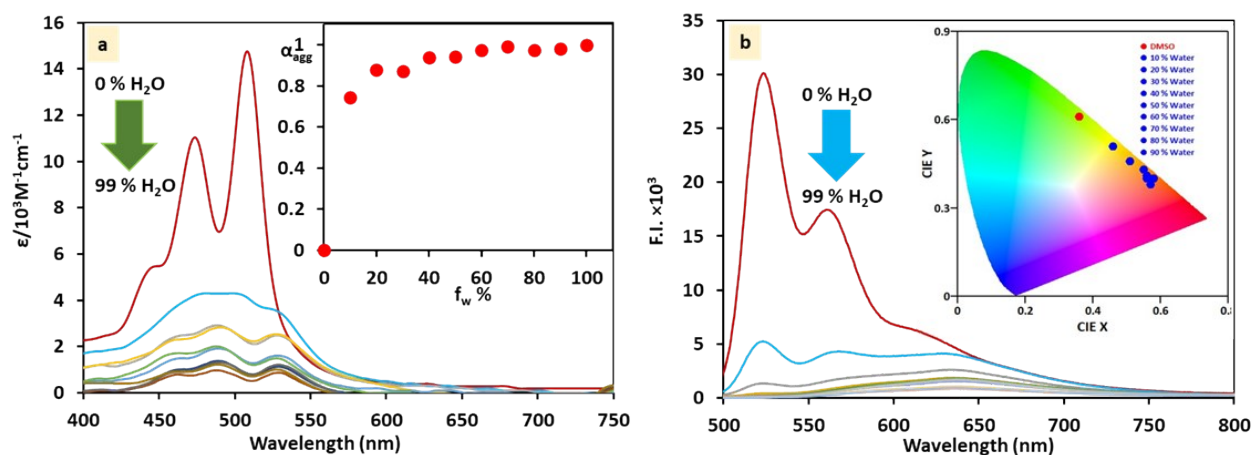

**Figure S5:** a) Absorption and b) emission spectra of **CDI 2** (10  $\mu\text{M}$ ) in different ratios of  $\text{H}_2\text{O}$  and DMSO.

**Table S1:** Franck-Condon factor ( $A_{0-0}/A_{0-1}$ ) values for **CDI 2** in 0–90%  $\text{H}_2\text{O}$ -DMSO binary mixtures.

| <i>Water Ratio</i> (%) | <i>508 nm</i> | <i>474 nm</i> | $A_{0-0}/A_{0-1}$ |
|------------------------|---------------|---------------|-------------------|
|                        | $A_{0-0}$     | $A_{0-1}$     |                   |
| 0                      | 14757.82      | 11035.17      | 1.337344          |
| 10                     | 4129.154      | 4222.331      | 0.977932          |
| 20                     | 2195.851      | 2562.092      | 0.857054          |
| 30                     | 2277.543      | 2412.461      | 0.944075          |
| 40                     | 1344.093      | 1581.734      | 0.849759          |
| 50                     | 1269.084      | 1742.703      | 0.728227          |
| 60                     | 832.5588      | 1064.837      | 0.781865          |
| 70                     | 545.8687      | 771.3584      | 0.707672          |
| 80                     | 838.0484      | 997.5219      | 0.84013           |
| 90                     | 728.8522      | 936.3005      | 0.778438          |

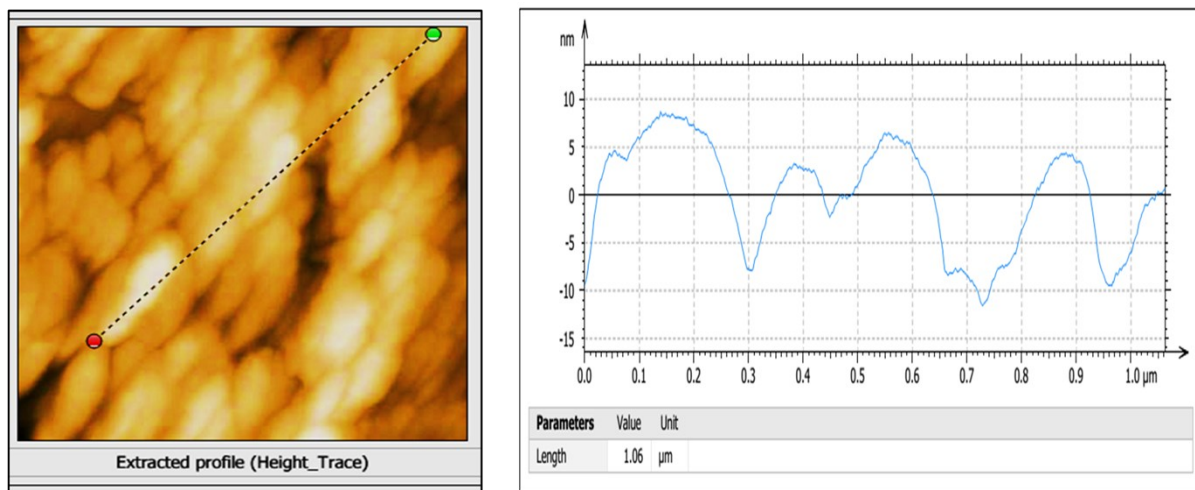

**Figure S6a:** Height trace extracted profile of AFM micrograph of **CDI 2** in DMSO showing ovaloid morphology with diameter graph.

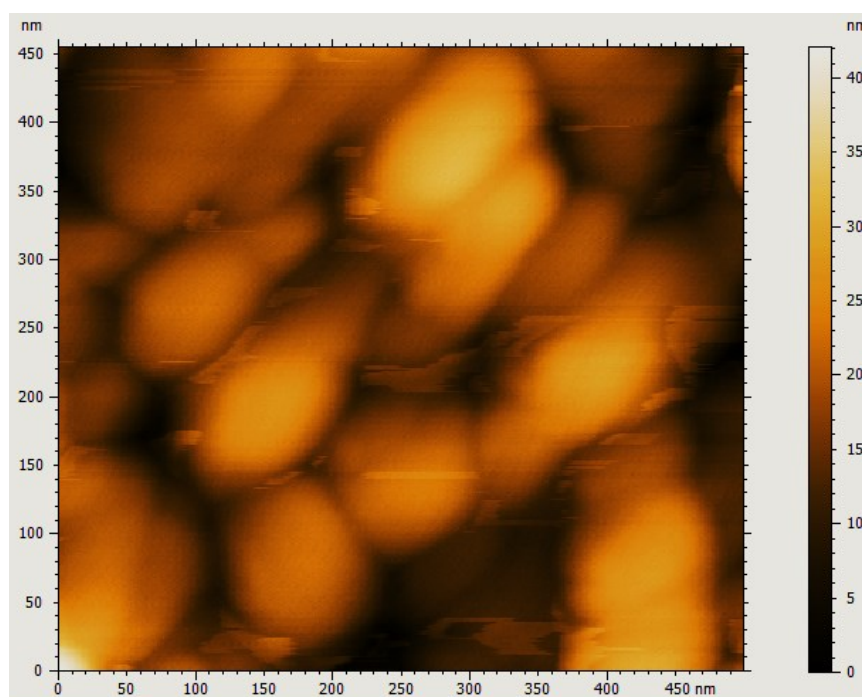

**Figure S6b:** AFM micrograph of **CDI 2** in 50% H<sub>2</sub>O-DMSO binary mixture clearly showing oval and spherical morphology

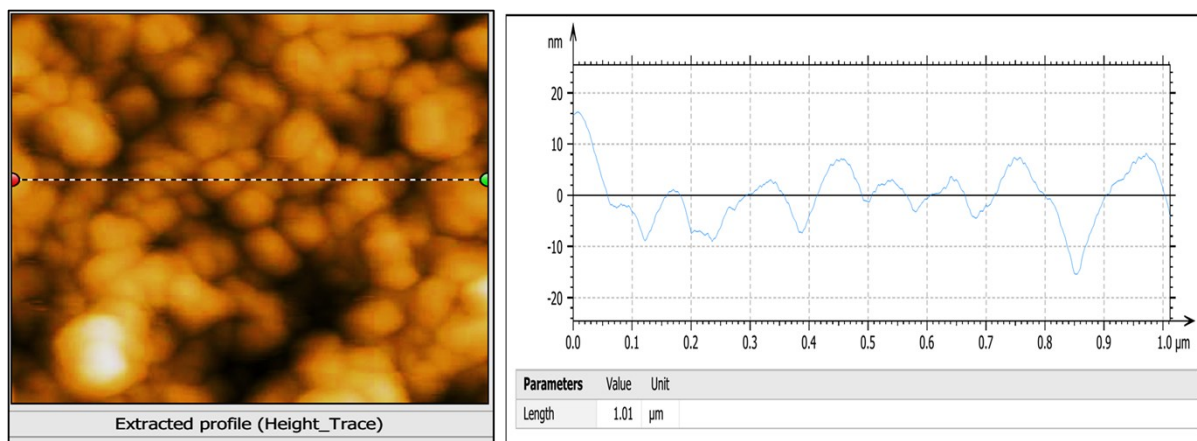

**Figure S6c:** Height trace extracted profile of AFM micrographs of **CDI 2** in 50%  $\text{H}_2\text{O}$ -DMSO binary mixture showing spherical morphology with diameter graph.

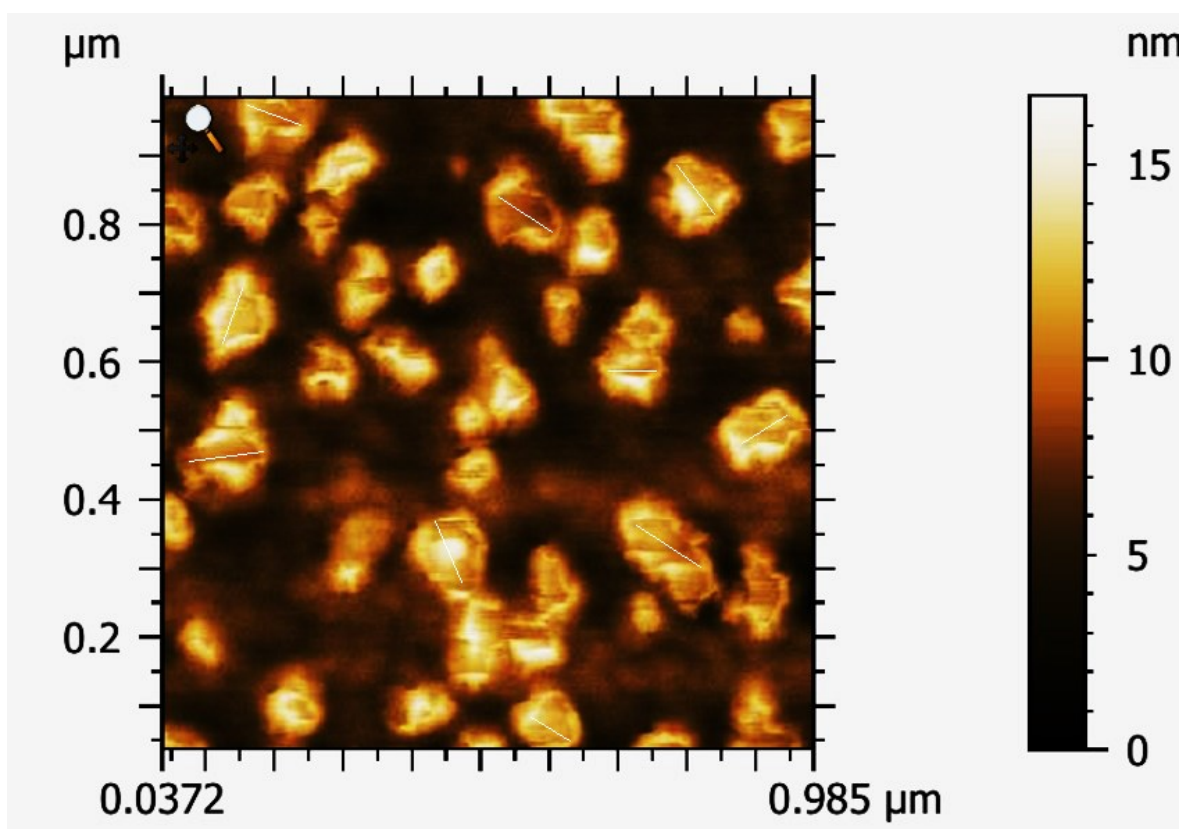

**Figure S6d:** AFM micrograph of **CDI 2** in 90%  $\text{H}_2\text{O}$ -DMSO binary mixture showing diameter of hollow cavity in the centre of interlinked fibroid morphology calculated by imagej software.

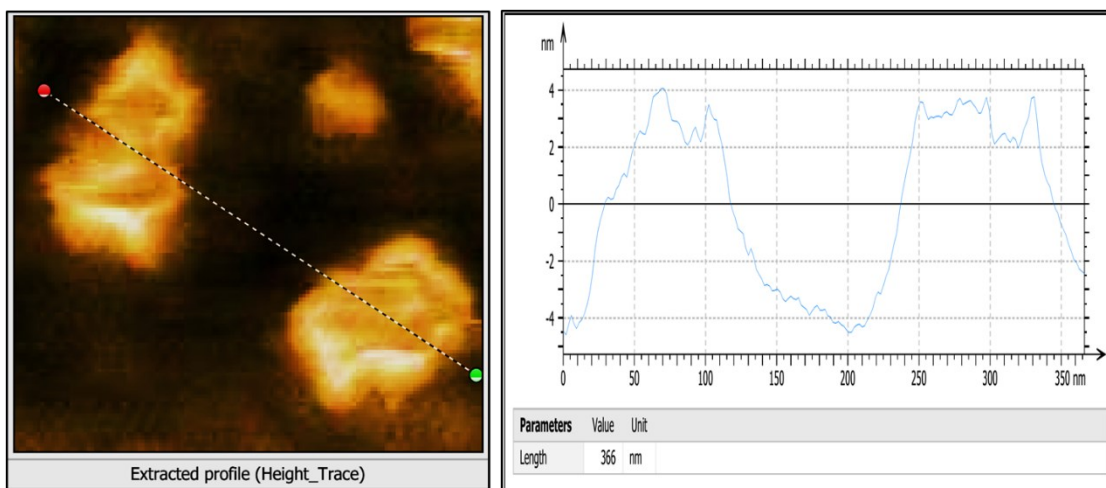

**Figure S6e:** Height trace extracted profile of AFM micrograph of **CDI 2** in 90% H<sub>2</sub>O-DMSO binary mixture showing interlinked fibroid morphology with diameter graph and depth of the cavity.

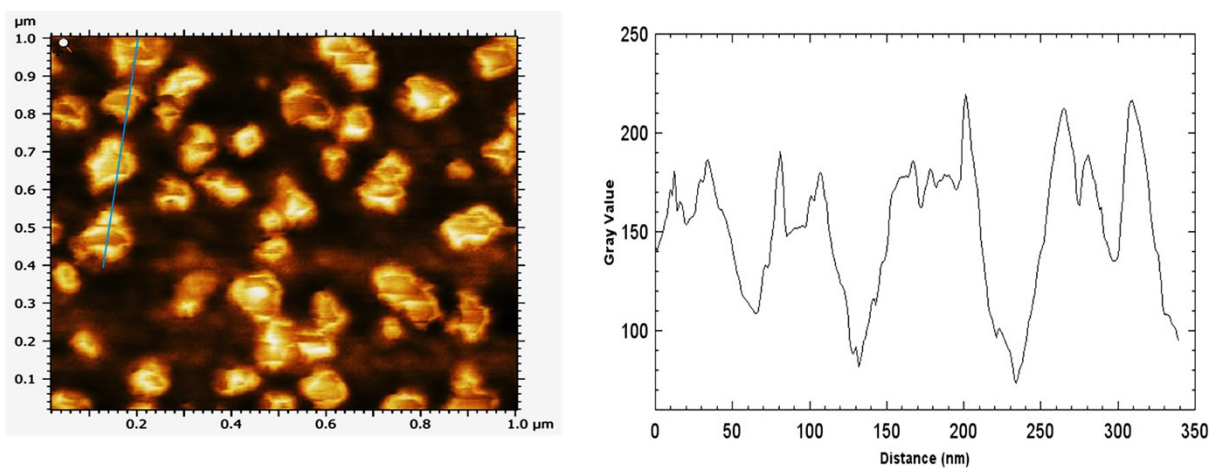

**Figure S6f:** Variation of the gray value of AFM micrograph of **CDI 2** in 90% H<sub>2</sub>O-DMSO binary mixture also showing inner hollow cavity.

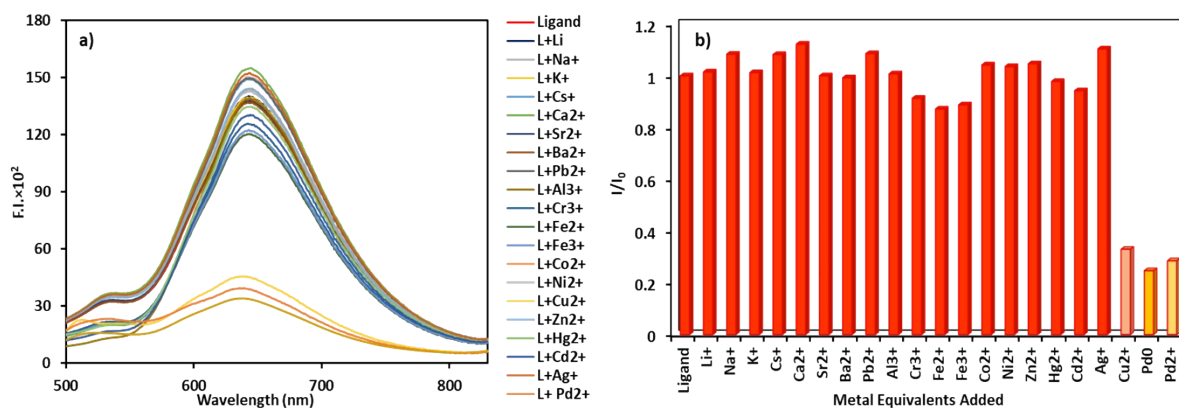

**Figure S6g:** UV-Vis absorption spectra of CDI 2 with various metal ions. The I/I<sub>0</sub> values are shown for various metal ions.

**Figure S7:** Emission spectra of **CDI 2** (5  $\mu\text{M}$ ) in the presence of different metal analytes recorded in 90% HEPES buffer : DMSO ( $10^{-2}$  M, pH 7.2) solution; slit width (Ex/Em) = 15/10 nm. Plot of (b)  $I/I_0$ (emission) versus metal equivalents added.

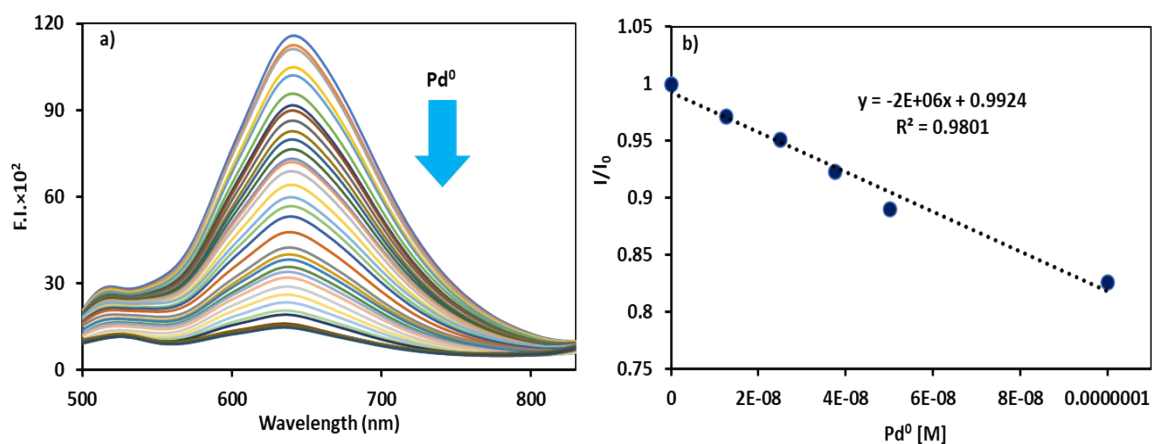

**Figure S8:** Emission spectra of **CDI 2** (5  $\mu\text{M}$ ) in the presence of  $\text{Cu}^{2+}$  ions recorded in 90% HEPES buffer : DMSO ( $10^{-2}$  M, pH 7.2) solution; slit width (Ex/Em) = 15/10 nm. Plot of (b)  $I/I_0$ (emission) versus concentrations of  $\text{Pd}^0$  ions to determine the lowest detection limits.

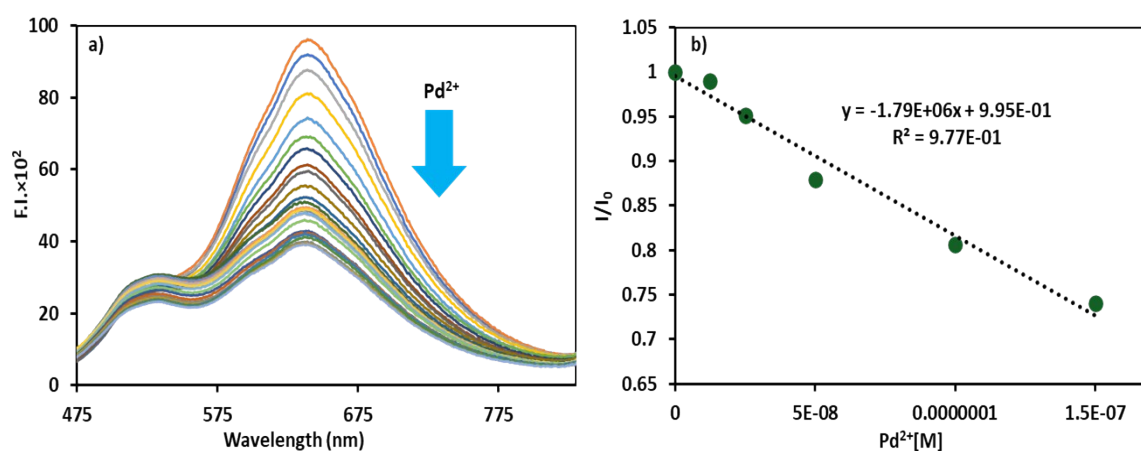

**Figure S9:** Emission spectra of **CDI 2** (5  $\mu\text{M}$ ) in the presence of  $\text{Cu}^{2+}$  ions recorded in 90% HEPES buffer : DMSO ( $10^{-2}$  M, pH 7.2) solution; slit width (Ex/Em) = 15/10 nm. Plot of (b)  $I/I_0$ (emission) versus concentrations of  $\text{Pd}^{2+}$  ions to determine the lowest detection limits.

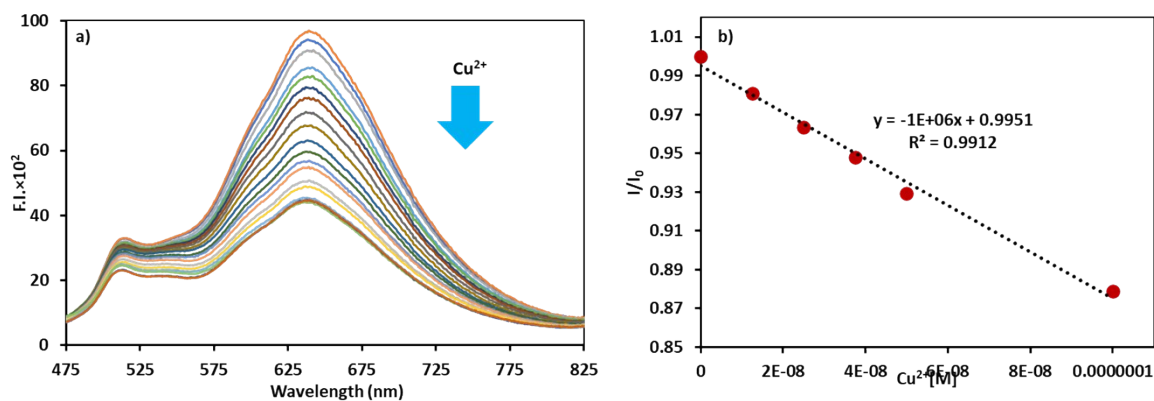

**Figure S10:** Emission spectra of **CDI 2** (5  $\mu\text{M}$ ) in the presence of  $\text{Cu}^{2+}$  ions recorded in 90% HEPES buffer : DMSO ( $10^{-2}$  M, pH 7.2) solution; slit width (Ex/Em) = 15/10 nm. Plot of (b)  $I/I_0$ (emission) versus concentrations of  $\text{Cu}^{2+}$  ions to determine the lowest detection limits.

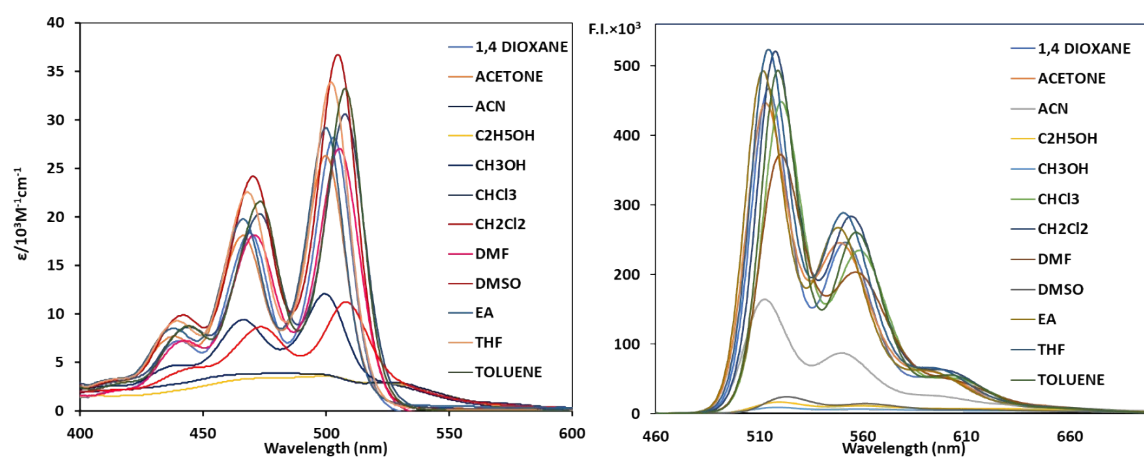

**Figure S11:** Absorption and emission spectra of **CDI 2** (10  $\mu\text{M}$ ) in different solvents.

**Table S2:** Comparison of some previously reported fluorescent materials for LFP development

| Ref. | Type of quantification    | Additives Added/Pre or Post Treatment | Method to develop     | Type of Surface Used | Visual Assesment           | Emission Intensity | Develop ment Time                        | Features Extracted |
|------|---------------------------|---------------------------------------|-----------------------|----------------------|----------------------------|--------------------|------------------------------------------|--------------------|
| 1.   | Fluorescent Nanomaterials | polyvinylpyrrolidone PVP coating      | powder dusting method | porous and nonporous | under illumination method  | Not mentioned      | 4 min. 30 s excitation at 455 and 525 nm | Level 3            |
| 2.   | NIR fluorescent polymer   | ninhydrin                             | Solid spray           | porous and           | Also visible to naked eyes | Not mentioned      | -                                        | Level 3            |

|     |                                                                                   |                                                                                  |                                                                           |                                    |                                         |                           |                 |               |
|-----|-----------------------------------------------------------------------------------|----------------------------------------------------------------------------------|---------------------------------------------------------------------------|------------------------------------|-----------------------------------------|---------------------------|-----------------|---------------|
|     |                                                                                   |                                                                                  |                                                                           | nonporous                          |                                         |                           |                 |               |
| 3.  | NIR-to-NIR upconversion nanoparticles of $\beta$ -NaYF <sub>4</sub> :2% Tm, 48%Yb | -                                                                                | powder dusting method                                                     | -                                  | under illumination method               | Not mentioned             | 0.5–1 h         | Level 2       |
| 4.  | Al(III) Schiff Base                                                               | Au <sup>3+</sup>                                                                 | powder dusting method                                                     | smooth surfaces                    | under illumination method               | 418- 572 nm               | -               | Not mentioned |
| 5.  | Fluorescent dyes                                                                  | -                                                                                | 0.1g/10 0mL dye solution                                                  | sticky side of adhesive tapes      | under illumination method               | 447-499 nm                | 0.5–2 min.      | Not explained |
| 6.  | Fluorescent dyes                                                                  | pretreatment with (0.01 M, pH 12.0) NaOH Sol.                                    | 2.0×10 <sup>-4</sup> M dye in ethanol: aqueous sodium hydroxide (1:1,v/v) | porous                             | naked eye and under illumination method | Not mentioned             | 1 h and 40 min. | Not explained |
| 7.  | Fluorescent Metal Complexes emitting deep blue light                              | Zn <sup>2+</sup> metal added                                                     | powder dusting method                                                     | nonporous                          | under illumination method (366 nm)      | Not mentioned             | -               | Not explained |
| 8.  | AIE active Fluorescent dyes                                                       | -                                                                                | 70% H <sub>2</sub> O:TH Fmixture (0.3 mM)                                 | non-porous                         | under UV 365 nm light                   | Not mentioned             | 3 min.          | Level 2       |
| 9.  | Dual state emission platform                                                      | traditional magnetic powders                                                     | powder dusting method                                                     | -                                  | nonporous                               | under illumination method | Not mentioned   | Level 2       |
| 10. | Fluorescent nanomaterial                                                          | -                                                                                | 50% H <sub>2</sub> O:CH <sub>3</sub> CN mixture                           | nonporous                          | under illumination method               | Not mentioned             | -               | Level 2       |
| 11. | Fluorescent dyes                                                                  | pretreatment of bloody stains with ethanol: water (40:60) in 2% 5-sulfosalicylic | 0.1g/10 0mL dye solution                                                  | porous, semi-porous and non-porous | bloody fingerprint                      | Not mentioned             | -               | Not explained |

|     |                      |                      |                                               |           |                           |               |            |         |
|-----|----------------------|----------------------|-----------------------------------------------|-----------|---------------------------|---------------|------------|---------|
|     |                      | acid                 |                                               |           |                           |               |            |         |
| 12. | AIE-active luminogen | cyanoacrylate fuming | CH <sub>3</sub> CN –water solution aggregates | nonporous | under illumination method | Not mentioned | 20 minutes | Level 3 |

**Table S3:** Comparison of some previously reported fluorescent materials based on benzocoronene.

| S. No. | Synthetic Mechanism of CDI                                                  | Self-assemblies Properties                       | Energy and electron transfer properties                                                                                      | Applications                                                                                     |
|--------|-----------------------------------------------------------------------------|--------------------------------------------------|------------------------------------------------------------------------------------------------------------------------------|--------------------------------------------------------------------------------------------------|
| 1.     | Photo-cyclization                                                           | Not mentioned                                    | Visible-light triggered photo-annulation approach                                                                            | Photo-responsive materials                                                                       |
| 2.     | Imidization with 2,6-diisopropylaniline                                     | Not mentioned                                    | Non-fullerene acceptors and tuneable optical and redox properties                                                            | Optoelectronic materials                                                                         |
| 3.     | Not mentioned                                                               | Not mentioned                                    | Electron acceptors                                                                                                           | To study ultrafast photoinduced intramolecular electron transfer                                 |
| 4.     | Not mentioned                                                               | Surface morphology Studied with AFM              | 4-octyltetradecyl side chains exhibits the highest electron mobility of 0.16 cm <sup>2</sup> V <sup>-1</sup> s <sup>-1</sup> | n-type organic semiconductors                                                                    |
| 5.     | Cyclodehydrogenation with DDQ in dry CH <sub>2</sub> Cl <sub>2</sub> at 0°C | Showing thermotropic liquid crystalline behavior |                                                                                                                              | Used as a “turn-on” probe for Pb <sup>2+</sup> or K <sup>+</sup>                                 |
| 6.     | Benzogenic Diels–Alder reaction                                             | Self-assembled nanofibers in aqueous solution    | Not mentioned                                                                                                                | Showing peroxidase-like catalytic activity for H <sub>2</sub> O <sub>2</sub> and glucose sensing |
| 7.     | Sunlight-driven photocyclization in CH <sub>2</sub> Cl <sub>2</sub>         | Self-assembled (fibre-to-disc)                   | Not mentioned                                                                                                                | Biolabeling and visualization of latent fingerprints on                                          |



|                    |                                        |                                                                                |                                                                                  |                                                                                           |
|--------------------|----------------------------------------|--------------------------------------------------------------------------------|----------------------------------------------------------------------------------|-------------------------------------------------------------------------------------------|
|                    |                                        | fluorescent aggregates                                                         |                                                                                  | different surfaces                                                                        |
| 8.                 | Sunlight-driven photocyclization       | Aggregation in 30 % DMF: H <sub>2</sub> O                                      | Not mentioned                                                                    | Imaging of latent fingerprints on non-porous and porous substrates                        |
| Present Manuscript | Photocyclization in CH <sub>3</sub> CN | Nano-sized interlinked fibre structures forming 'bowl' shaped nanoarchitecture | Red emitters with CIE coordinates (x,y) of (0.67, 0.33) with 100 % colour purity | For visualization of latent fingerprints (LFPs) and metal ion detection in aqueous medium |
